# Supplementary material for: Leaf Bacteriome in Sugar Beet Shows Differential Response against Beet curly top virus during Resistant and Susceptible Interactions
Source: MDPI journal article supplement (doi:10.3390/ijms23158073), 2022-07-22
Supplement: s1 [file s1]

**Table S1.** Overview of reads for different samples. C = control, I = infected, and M = million.

| Sample     | Raw Tags | Raw Bases | Valid Tags | Valid Bases | Valid% | Q20%  | Q30%  | GC%   |
|------------|----------|-----------|------------|-------------|--------|-------|-------|-------|
| d6_C_19_1  | 85335    | 42.67M    | 71787      | 29.00M      | 84.12  | 93.87 | 84.47 | 56.28 |
| d6_C_19_2  | 82013    | 41.01M    | 73960      | 29.89M      | 90.18  | 96.55 | 90.54 | 55.93 |
| d6_C_19_3  | 80373    | 40.19M    | 74759      | 30.20M      | 93.02  | 96.40 | 89.99 | 56.03 |
| d6_C_19_4  | 82705    | 41.35M    | 73093      | 29.53M      | 88.38  | 96.04 | 89.15 | 56.06 |
| d6_C_13_1  | 82750    | 41.38M    | 72896      | 29.45M      | 88.09  | 95.68 | 88.41 | 56.07 |
| d6_C_13_2  | 86736    | 43.37M    | 79028      | 31.93M      | 91.11  | 95.81 | 88.81 | 56.06 |
| d6_C_13_3  | 80795    | 40.40M    | 67913      | 27.44M      | 84.06  | 95.34 | 87.65 | 56.12 |
| d6_C_13_4  | 85393    | 42.70M    | 67643      | 27.33M      | 79.21  | 92.68 | 82.16 | 56.41 |
| d6_C_4_1   | 78520    | 39.26M    | 64093      | 25.89M      | 81.63  | 92.80 | 82.33 | 56.45 |
| d6_C_4_2   | 86203    | 43.10M    | 78125      | 31.56M      | 90.63  | 96.26 | 89.67 | 56.01 |
| d6_C_4_3   | 87012    | 43.51M    | 82847      | 33.52M      | 95.21  | 96.78 | 91.02 | 55.97 |
| d6_C_4_4   | 81990    | 40.99M    | 71330      | 28.82M      | 87.00  | 95.16 | 86.91 | 56.13 |
| d6_I_19_1  | 85972    | 42.99M    | 78511      | 31.72M      | 91.32  | 96.17 | 89.59 | 56.01 |
| d6_I_19_2  | 86788    | 43.39M    | 80274      | 32.43M      | 92.49  | 95.75 | 88.67 | 56.07 |
| d6_I_19_3  | 81295    | 40.65M    | 71068      | 28.71M      | 87.42  | 95.76 | 88.66 | 56.09 |
| d6_I_19_4  | 80583    | 40.29M    | 67658      | 27.34M      | 83.96  | 94.21 | 85.14 | 56.21 |
| d6_I_19_5  | 83900    | 41.95M    | 72272      | 29.20M      | 86.14  | 94.24 | 85.21 | 56.25 |
| d6_I_13_1  | 85539    | 42.77M    | 77144      | 31.17M      | 90.19  | 96.46 | 90.33 | 56.03 |
| d6_I_13_2  | 82935    | 41.47M    | 77856      | 31.46M      | 93.88  | 96.57 | 90.49 | 56.03 |
| d6_I_13_3  | 80790    | 40.40M    | 72139      | 29.14M      | 89.29  | 96.42 | 90.21 | 56.04 |
| d6_I_13_4  | 86457    | 43.23M    | 77757      | 31.41M      | 89.94  | 95.93 | 89.03 | 56.08 |
| d6_I_13_5  | 78706    | 39.35M    | 70300      | 28.40M      | 89.32  | 95.61 | 88.33 | 56.16 |
| d6_I_4_1   | 83258    | 41.63M    | 71312      | 28.81M      | 85.65  | 95.64 | 88.45 | 56.10 |
| d6_I_4_2   | 83737    | 41.87M    | 66681      | 27.59M      | 79.63  | 92.56 | 82.32 | 54.92 |
| d6_I_4_3   | 84241    | 42.12M    | 72031      | 30.43M      | 85.51  | 93.32 | 83.59 | 55.20 |
| d6_I_4_4   | 80036    | 40.02M    | 56078      | 23.61M      | 70.07  | 95.73 | 88.63 | 54.10 |
| d6_I_4_5   | 82181    | 41.09M    | 62162      | 26.00M      | 75.64  | 95.35 | 87.61 | 52.43 |
| wk4_C_19_1 | 80068    | 40.03M    | 57572      | 24.08M      | 71.90  | 95.98 | 89.03 | 51.95 |
| wk4_C_19_2 | 83021    | 41.51M    | 60438      | 25.15M      | 72.80  | 95.14 | 87.08 | 51.39 |
| wk4_C_19_3 | 81101    | 40.55M    | 63815      | 26.71M      | 78.69  | 94.50 | 85.75 | 53.21 |
| wk4_C_19_4 | 85060    | 42.53M    | 62222      | 25.68M      | 73.15  | 94.73 | 86.22 | 54.10 |
| wk4_C_13_1 | 81131    | 40.57M    | 58123      | 24.02M      | 71.64  | 93.08 | 83.06 | 54.19 |
| wk4_C_13_2 | 82614    | 41.31M    | 64620      | 26.29M      | 78.22  | 92.71 | 82.25 | 55.02 |
| wk4_C_13_3 | 86060    | 43.03M    | 68359      | 27.90M      | 79.43  | 96.64 | 90.52 | 54.51 |
| wk4_C_13_4 | 86377    | 43.19M    | 73267      | 29.85M      | 84.82  | 96.79 | 90.82 | 54.78 |
| wk4_C_4_1  | 86401    | 43.20M    | 66876      | 27.30M      | 77.40  | 96.47 | 90.13 | 54.82 |
| wk4_C_4_2  | 81929    | 40.96M    | 63744      | 26.09M      | 77.80  | 95.96 | 88.80 | 54.29 |
| wk4_C_4_3  | 80164    | 40.08M    | 64220      | 26.40M      | 80.11  | 95.81 | 88.54 | 53.49 |
| wk4_C_4_4  | 80482    | 40.24M    | 62164      | 25.62M      | 77.24  | 95.36 | 87.57 | 53.58 |
| wk4_I_19_1 | 86927    | 43.46M    | 64151      | 26.28M      | 73.80  | 93.55 | 83.88 | 54.96 |
| wk4_I_19_2 | 82340    | 41.17M    | 64083      | 26.06M      | 77.83  | 95.04 | 86.83 | 55.02 |
| wk4_I_19_3 | 83944    | 41.97M    | 63848      | 26.26M      | 76.06  | 96.17 | 89.34 | 55.01 |
| wk4_I_19_4 | 80613    | 40.31M    | 64175      | 26.26M      | 79.61  | 95.79 | 88.23 | 54.59 |
| wk4_I_19_5 | 84164    | 42.08M    | 65614      | 26.74M      | 77.96  | 96.18 | 89.38 | 55.12 |
| wk4_I_13_1 | 85004    | 42.50M    | 68252      | 27.94M      | 80.29  | 96.05 | 89.01 | 54.25 |
| wk4_I_13_2 | 86084    | 43.04M    | 70362      | 28.93M      | 81.74  | 94.87 | 86.35 | 53.87 |
| wk4_I_13_3 | 80635    | 40.32M    | 59601      | 24.63M      | 73.91  | 95.53 | 87.97 | 53.70 |
| wk4_I_13_4 | 70238    | 35.12M    | 57926      | 23.83M      | 82.47  | 94.07 | 84.83 | 53.81 |
| wk4_I_13_5 | 87187    | 43.59M    | 69312      | 28.49M      | 79.50  | 94.71 | 86.09 | 54.92 |
| wk4_I_4_1  | 80440    | 40.22M    | 62769      | 25.81M      | 78.03  | 96.19 | 89.43 | 54.73 |
| wk4_I_4_2  | 83633    | 41.82M    | 69029      | 28.31M      | 82.54  | 96.41 | 89.91 | 53.83 |
| wk4_I_4_3  | 82843    | 41.42M    | 66014      | 27.06M      | 79.69  | 96.42 | 89.96 | 53.60 |
| wk4_I_4_4  | 80077    | 40.04M    | 66076      | 27.18M      | 82.52  | 96.25 | 89.55 | 53.82 |
| wk4_I_4_5  | 83907    | 41.95M    | 67475      | 27.65M      | 80.42  | 95.77 | 88.51 | 54.72 |

**Table S2.** Top 30 bacterial phyla (%) detected in the leaves of *Beet curly top virus* susceptible (Line 19) and resistance (Line 13 and Line 4) sugar beet lines. C = control, and I = infected.

| Phylum             | d6_C_19 | d6_C_13 | d6_C_4 |  | d6_I_19 | d6_I_13 | d6_I_4 |  | wk4_C_19 | wk4_C_13 | wk4_C_4 |  | wk4_I_19 | wk4_I_13 | wk4_I_4 |
|--------------------|---------|---------|--------|--|---------|---------|--------|--|----------|----------|---------|--|----------|----------|---------|
| Cyanobacteria      | 92.460  | 92.358  | 93.940 |  | 91.98   | 95.64   | 19.06  |  | 4.10     | 0.09     | 0.10    |  | 0.06     | 0.03     | 0.02    |
| Firmicutes         | 0.072   | 0.011   | 0.019  |  | 0.03    | 0.04    | 29.66  |  | 11.32    | 58.33    | 54.27   |  | 66.15    | 51.24    | 42.96   |
| Bacteroidetes      | 0.088   | 0.005   | 0.004  |  | 0.00    | 0.00    | 6.86   |  | 24.86    | 21.75    | 23.94   |  | 17.71    | 26.37    | 20.47   |
| Verrucomicrobia    | 0.005   | 0.003   | 0.005  |  | 0.00    | 0.00    | 1.96   |  | 13.21    | 15.05    | 18.18   |  | 12.67    | 18.42    | 29.20   |
| Proteobacteria     | 7.352   | 7.623   | 6.022  |  | 7.97    | 4.31    | 29.00  |  | 29.95    | 3.25     | 2.44    |  | 2.34     | 3.04     | 2.73    |
| Actinobacteria     | 0.021   | 0.000   | 0.006  |  | 0.01    | 0.01    | 5.42   |  | 14.50    | 1.41     | 0.85    |  | 0.80     | 0.56     | 0.38    |
| Epsilonbacteraeota | 0.000   | 0.000   | 0.000  |  | 0.00    | 0.00    | 0.15   |  | 0.01     | 0.00     | 0.00    |  | 0.00     | 0.00     | 4.01    |
| Chloroflexi        | 0.001   | 0.000   | 0.002  |  | 0.00    | 0.00    | 2.13   |  | 0.21     | 0.00     | 0.00    |  | 0.00     | 0.00     | 0.00    |
| unclassified       | 0.000   | 0.000   | 0.000  |  | 0.00    | 0.00    | 0.43   |  | 0.06     | 0.12     | 0.22    |  | 0.25     | 0.32     | 0.23    |
| Acidobacteria      | 0.000   | 0.000   | 0.000  |  | 0.00    | 0.00    | 1.11   |  | 0.12     | 0.00     | 0.00    |  | 0.00     | 0.00     | 0.00    |
| Gemmatimonadetes   | 0.000   | 0.000   | 0.002  |  | 0.00    | 0.00    | 0.62   |  | 0.18     | 0.00     | 0.00    |  | 0.00     | 0.00     | 0.00    |
| Planctomycetes     | 0.000   | 0.000   | 0.000  |  | 0.00    | 0.00    | 0.42   |  | 0.41     | 0.00     | 0.00    |  | 0.00     | 0.00     | 0.00    |
| Armatimonadetes    | 0.000   | 0.000   | 0.000  |  | 0.00    | 0.00    | 0.01   |  | 0.90     | 0.00     | 0.00    |  | 0.00     | 0.00     | 0.00    |
| Spirochaetes       | 0.000   | 0.000   | 0.000  |  | 0.00    | 0.00    | 0.64   |  | 0.00     | 0.00     | 0.00    |  | 0.00     | 0.00     | 0.00    |
| Kiritimatiellaeota | 0.000   | 0.000   | 0.000  |  | 0.00    | 0.00    | 0.33   |  | 0.00     | 0.00     | 0.00    |  | 0.00     | 0.00     | 0.00    |
| Latescibacteria    | 0.000   | 0.000   | 0.000  |  | 0.00    | 0.00    | 0.30   |  | 0.00     | 0.00     | 0.00    |  | 0.00     | 0.00     | 0.00    |
| Nitrospirae        | 0.000   | 0.000   | 0.000  |  | 0.00    | 0.00    | 0.27   |  | 0.00     | 0.00     | 0.00    |  | 0.00     | 0.00     | 0.00    |
| Calditrichaeota    | 0.000   | 0.000   | 0.000  |  | 0.00    | 0.00    | 0.24   |  | 0.00     | 0.00     | 0.00    |  | 0.00     | 0.00     | 0.00    |
| Patescibacteria    | 0.000   | 0.000   | 0.000  |  | 0.00    | 0.00    | 0.14   |  | 0.10     | 0.00     | 0.00    |  | 0.00     | 0.00     | 0.00    |
| Rokubacteria       | 0.000   | 0.000   | 0.000  |  | 0.00    | 0.00    | 0.21   |  | 0.01     | 0.00     | 0.00    |  | 0.00     | 0.00     | 0.00    |
| Tenericutes        | 0.000   | 0.000   | 0.000  |  | 0.00    | 0.00    | 0.16   |  | 0.00     | 0.00     | 0.00    |  | 0.00     | 0.01     | 0.00    |
| Lentisphaerae      | 0.000   | 0.000   | 0.000  |  | 0.00    | 0.00    | 0.16   |  | 0.01     | 0.00     | 0.00    |  | 0.00     | 0.00     | 0.00    |
| Fusobacteria       | 0.000   | 0.000   | 0.000  |  | 0.00    | 0.00    | 0.14   |  | 0.00     | 0.00     | 0.00    |  | 0.00     | 0.00     | 0.00    |
| BRC1               | 0.000   | 0.000   | 0.000  |  | 0.00    | 0.00    | 0.12   |  | 0.00     | 0.00     | 0.00    |  | 0.00     | 0.00     | 0.00    |
| Chlamydiae         | 0.000   | 0.000   | 0.000  |  | 0.00    | 0.00    | 0.08   |  | 0.00     | 0.00     | 0.00    |  | 0.00     | 0.00     | 0.00    |
| Omnitrophicaeota   | 0.000   | 0.000   | 0.000  |  | 0.00    | 0.00    | 0.04   |  | 0.01     | 0.00     | 0.00    |  | 0.00     | 0.00     | 0.00    |
| Chlorobi           | 0.000   | 0.000   | 0.000  |  | 0.00    | 0.00    | 0.04   |  | 0.00     | 0.00     | 0.00    |  | 0.00     | 0.00     | 0.00    |
| GAL15              | 0.000   | 0.000   | 0.000  |  | 0.00    | 0.00    | 0.04   |  | 0.00     | 0.00     | 0.00    |  | 0.00     | 0.00     | 0.00    |
| Cloacimonetes      | 0.000   | 0.000   | 0.000  |  | 0.00    | 0.00    | 0.04   |  | 0.00     | 0.00     | 0.00    |  | 0.00     | 0.00     | 0.00    |
| WS2                | 0.000   | 0.000   | 0.000  |  | 0.00    | 0.00    | 0.04   |  | 0.00     | 0.00     | 0.00    |  | 0.00     | 0.00     | 0.00    |

**Table S3.** Top 30 bacterial genera (%) detected in the leaves of *Beet curly top virus* susceptible (Line 19) and resistance (Line 13 and Line 4) sugar beet lines. C = control, and I = infected.

| Genus                                                 | d6 C  | 19d6 C | 13d6 C | 4d6 C | d6 I  | 19d6 I | 13d6 I | 4d6 I | wk4 C | 15wk4 C | 1wk4 C | 4wk4 C | wk4 I | 15wk4 I | 1wk4 I | 4wk4 I |
|-------------------------------------------------------|-------|--------|--------|-------|-------|--------|--------|-------|-------|---------|--------|--------|-------|---------|--------|--------|
| Oxyphotobacteria unclassified                         | 92.46 | 92.36  | 93.94  |       | 91.98 | 95.64  | 18.90  |       | 3.62  | 0.09    | 0.10   |        | 0.06  | 0.03    | 0.02   |        |
| Akkermansia                                           | 0.00  | 0.00   | 0.01   |       | 0.00  | 0.00   | 0.01   |       | 3.28  | 15.05   | 18.18  |        | 12.67 | 18.42   | 29.20  |        |
| Muribaculaceae unclassified                           | 0.00  | 0.00   | 0.00   |       | 0.00  | 0.00   | 0.05   |       | 1.34  | 9.13    | 10.00  |        | 10.12 | 8.88    | 10.05  |        |
| Bacteroides                                           | 0.00  | 0.00   | 0.00   |       | 0.00  | 0.00   | 0.00   |       | 0.82  | 4.94    | 10.19  |        | 4.96  | 8.28    | 6.96   |        |
| Ruminococcaceae UCG-013                               | 0.00  | 0.00   | 0.00   |       | 0.00  | 0.00   | 0.00   |       | 3.43  | 4.94    | 4.32   |        | 10.12 | 5.92    | 4.76   |        |
| Lachnospiraceae NK4A136 group                         | 0.00  | 0.00   | 0.00   |       | 0.00  | 0.00   | 0.00   |       | 1.15  | 8.31    | 3.83   |        | 7.91  | 5.55    | 6.30   |        |
| Mitochondria unclassified                             | 7.20  | 7.60   | 5.20   |       | 7.95  | 4.30   | 1.49   |       | 0.00  | 0.00    | 0.00   |        | 0.00  | 0.00    | 0.00   |        |
| Brevibacillus                                         | 0.00  | 0.00   | 0.00   |       | 0.03  | 0.04   | 28.22  |       | 0.05  | 0.00    | 0.00   |        | 0.01  | 0.00    | 0.00   |        |
| Lachnospiraceae unclassified                          | 0.00  | 0.00   | 0.00   |       | 0.00  | 0.00   | 0.06   |       | 0.79  | 7.33    | 4.75   |        | 5.59  | 4.18    | 4.01   |        |
| Dubosiella                                            | 0.00  | 0.00   | 0.00   |       | 0.00  | 0.00   | 0.00   |       | 0.93  | 1.35    | 4.57   |        | 4.58  | 7.29    | 4.37   |        |
| Eisenbergiella                                        | 0.00  | 0.00   | 0.00   |       | 0.00  | 0.00   | 0.01   |       | 1.07  | 4.30    | 2.46   |        | 5.09  | 2.32    | 2.97   |        |
| Clostridiales unclassified                            | 0.00  | 0.00   | 0.00   |       | 0.00  | 0.00   | 0.00   |       | 0.20  | 1.98    | 4.99   |        | 3.87  | 2.34    | 2.38   |        |
| Parabacteroides                                       | 0.00  | 0.00   | 0.00   |       | 0.00  | 0.00   | 0.00   |       | 4.64  | 4.15    | 0.00   |        | 0.00  | 7.29    | 0.00   |        |
| Limnochabitans                                        | 0.00  | 0.00   | 0.00   |       | 0.00  | 0.00   | 3.89   |       | 11.47 | 0.00    | 0.01   |        | 0.00  | 0.00    | 0.00   |        |
| Parasutterella                                        | 0.01  | 0.00   | 0.00   |       | 0.00  | 0.00   | 0.00   |       | 1.69  | 3.24    | 2.31   |        | 2.22  | 2.27    | 1.44   |        |
| Acetatifactor                                         | 0.00  | 0.00   | 0.00   |       | 0.00  | 0.00   | 0.00   |       | 0.06  | 3.77    | 3.56   |        | 2.29  | 1.80    | 1.52   |        |
| Clostridiales Family XIV. Incertae Sedis unclassified | 0.00  | 0.00   | 0.00   |       | 0.00  | 0.00   | 0.00   |       | 0.33  | 3.14    | 2.31   |        | 1.27  | 1.97    | 1.68   |        |
| A2                                                    | 0.00  | 0.00   | 0.00   |       | 0.00  | 0.00   | 0.00   |       | 0.23  | 3.13    | 1.47   |        | 1.25  | 2.99    | 1.41   |        |
| Harryflintia                                          | 0.00  | 0.00   | 0.00   |       | 0.00  | 0.00   | 0.00   |       | 0.08  | 1.01    | 1.80   |        | 6.19  | 0.61    | 0.00   |        |
| Clostridiales_vadinBB60_group_unclassified            | 0.00  | 0.00   | 0.00   |       | 0.00  | 0.00   | 0.00   |       | 0.06  | 2.98    | 2.49   |        | 0.63  | 3.05    | 0.51   |        |
| Alistipes                                             | 0.00  | 0.00   | 0.00   |       | 0.00  | 0.00   | 0.00   |       | 0.55  | 2.40    | 2.00   |        | 1.88  | 1.89    | 0.69   |        |
| Intestinimonas                                        | 0.00  | 0.00   | 0.00   |       | 0.00  | 0.00   | 0.00   |       | 0.14  | 1.68    | 2.00   |        | 2.01  | 1.76    | 1.26   |        |
| hgcI clade                                            | 0.00  | 0.00   | 0.00   |       | 0.00  | 0.00   | 1.68   |       | 5.82  | 0.00    | 0.00   |        | 0.00  | 0.00    | 0.00   |        |
| Prostheco bacter                                      | 0.00  | 0.00   | 0.00   |       | 0.00  | 0.00   | 0.20   |       | 7.32  | 0.00    | 0.00   |        | 0.00  | 0.00    | 0.00   |        |
| Clostridium                                           | 0.00  | 0.00   | 0.00   |       | 0.00  | 0.00   | 0.00   |       | 0.23  | 1.65    | 1.27   |        | 1.12  | 1.19    | 0.92   |        |
| Ruminiclostridium 9                                   | 0.00  | 0.00   | 0.00   |       | 0.00  | 0.00   | 0.00   |       | 0.12  | 1.23    | 1.35   |        | 1.26  | 1.32    | 0.90   |        |
| Romboutsia                                            | 0.00  | 0.00   | 0.00   |       | 0.00  | 0.00   | 0.00   |       | 0.86  | 1.31    | 2.49   |        | 1.22  | 0.33    | 0.06   |        |
| Oscillibacter                                         | 0.00  | 0.00   | 0.00   |       | 0.00  | 0.00   | 0.00   |       | 0.04  | 1.57    | 0.88   |        | 0.61  | 0.81    | 1.22   |        |
| Muribaculum                                           | 0.01  | 0.00   | 0.00   |       | 0.00  | 0.00   | 0.00   |       | 0.77  | 1.12    | 1.72   |        | 0.70  | 0.00    | 0.68   |        |
| Firmicutes_unclassified                               | 0.00  | 0.00   | 0.00   |       | 0.00  | 0.00   | 0.03   |       | 0.26  | 0.40    | 0.61   |        | 1.65  | 1.18    | 0.26   |        |
| Others                                                | 0.30  | 0.03   | 0.84   |       | 0.04  | 0.02   | 45.45  |       | 48.66 | 9.80    | 10.33  |        | 10.71 | 8.32    | 16.41  |        |
